# Supplementary material for: Size modulation of MIL-125 nanocrystals to promote the catalytic performance towards oxidative desulfurization
Source: Royal Society of Chemistry journal article supplement (doi:10.1039/d1dt00774b), 2021-01-01
Supplement: d1dt00774b1.pdf [file d1dt00774b1.pdf]

## Electronic Supplementary Information

### Size modulation of MIL-125 nanocrystals to promote the catalytic performance towards oxidative desulfurization

Na Li, Zong-Wen Zhang, Jia-Ni Zhang, Yue Ma, Xiao-Yu Chen and Yang Fan\*

College of Chemistry and Chemical Engineering, Xinyang Normal University, Xinyang 464000, China

#### Contents

**Table 1.** Textural properties of the MIL-125 samples.

**Fig. S1** IR spectra of (a) the MIL-125 samples and (b) *trans*-cinnamic acid.

**Fig. S2** Ti 2p XPS spectra of the MIL-125 samples.

**Fig. S3** LC-MS analysis of the products for ODS of (a) DBT and (b) 4,6-DMDBT.

**Fig. S4** Recycle tests in the ODS of DBT over (a) MIL-125-CA-5 and (b) MIL-125.

**Fig. S5** PXRD patterns of MIL-125-CA-5 before and after reaction in the recycle tests.

**Fig. S6** SEM image of MIL-125-CA-5 after reaction in the recycle tests.

**Table 1.** Textural properties of the MIL-125 samples.

| Sample       | $S_{\text{BET}}$ (m <sup>2</sup> /g) <sup>a</sup> | $S_{\text{ext}}$ (m <sup>2</sup> /g) <sup>b</sup> | $V_{\text{total}}$ (cm <sup>3</sup> /g) | $V_{\text{micro}}$ (cm <sup>3</sup> /g) <sup>b</sup> | $V_{\text{micro}}/V_{\text{total}}$ |
|--------------|---------------------------------------------------|---------------------------------------------------|-----------------------------------------|------------------------------------------------------|-------------------------------------|
| MIL-125      | 1320                                              | 181                                               | 0.67                                    | 0.56                                                 | 0.84                                |
| MIL-125-CA-1 | 1465                                              | 190                                               | 0.63                                    | 0.49                                                 | 0.78                                |
| MIL-125-CA-3 | 1515                                              | 203                                               | 0.69                                    | 0.51                                                 | 0.74                                |
| MIL-125-CA-5 | 1377                                              | 251                                               | 0.73                                    | 0.44                                                 | 0.60                                |

<sup>a</sup>Specific surface area calculated using the BET method.

<sup>b</sup> $S_{\text{ext}}$  (external surface area) and  $V_{\text{micro}}$  (micropore volume) calculated using the  $t$ -plot method.

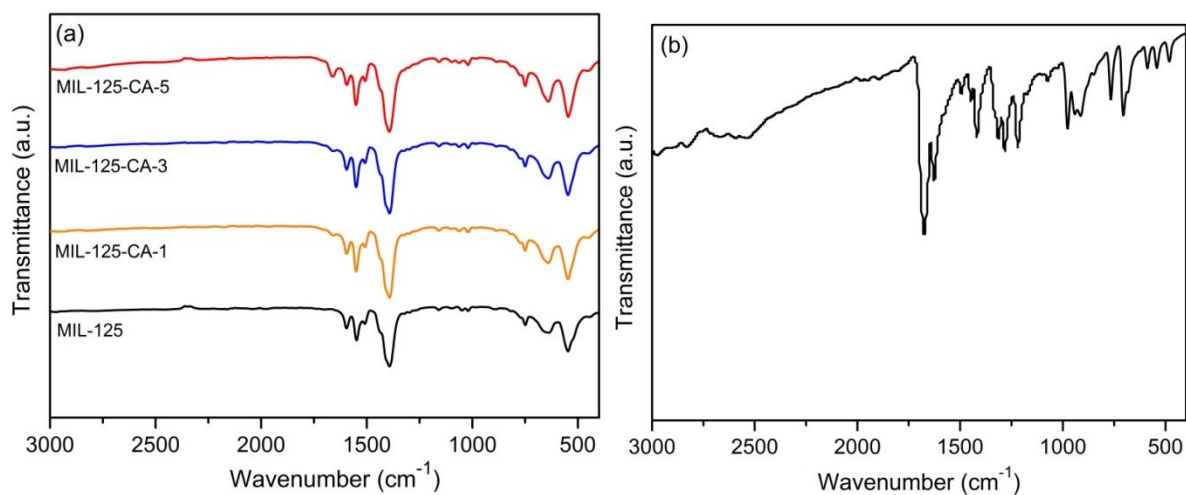

**Fig. S1** IR spectra of the (a) MIL-125 samples and (b) *trans*-cinnamic acid.

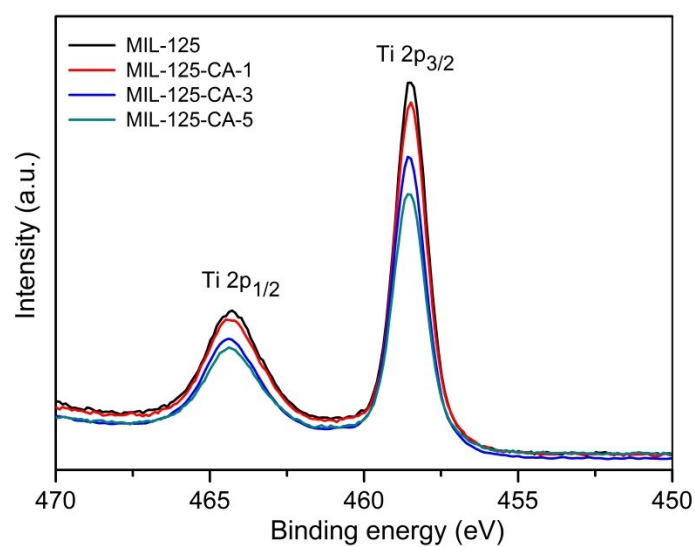

**Fig. S2** Ti 2p XPS spectra of the MIL-125 samples.

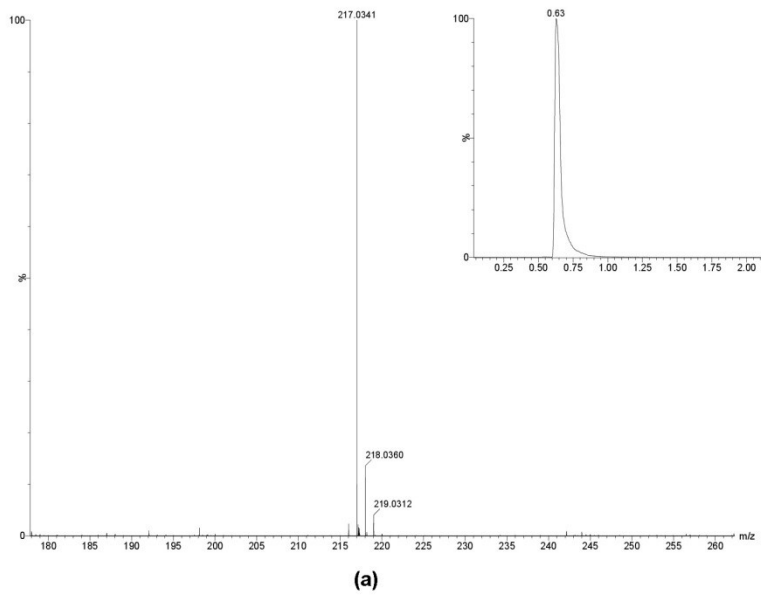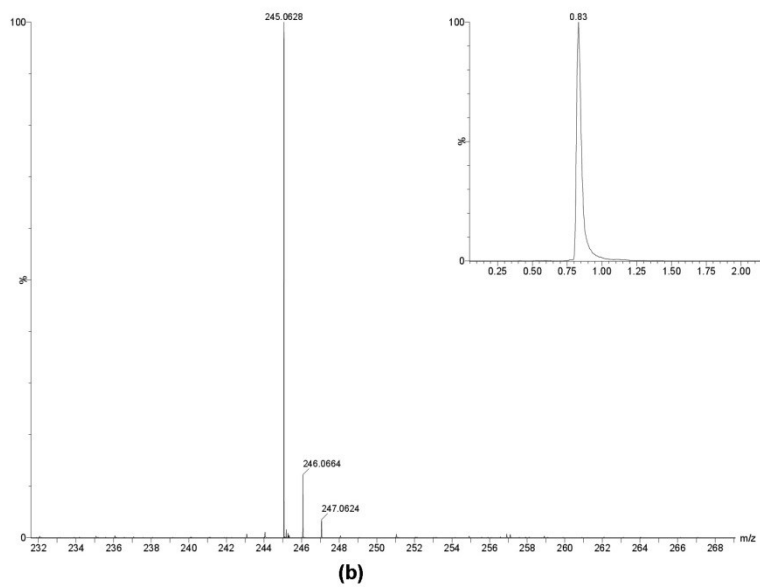

**Fig. S3** LC-MS analysis of the products for ODS of (a) DBT and (b) 4,6-DMDBT.

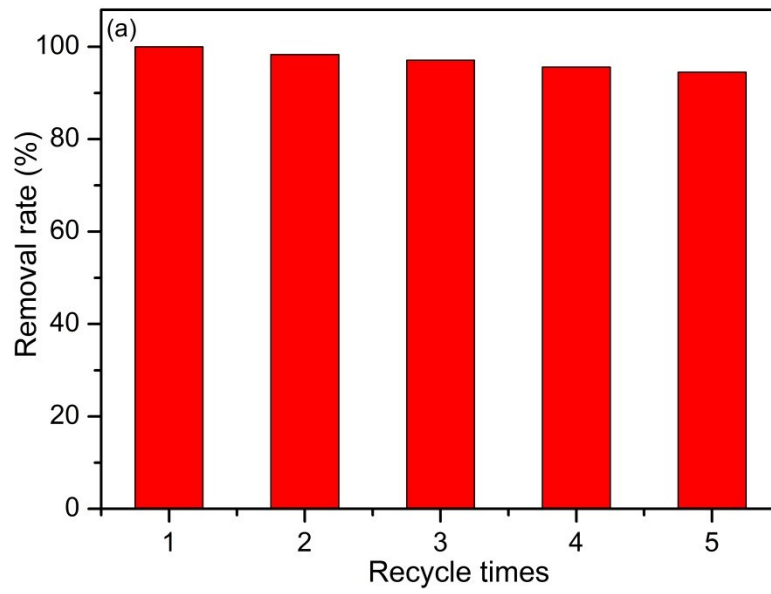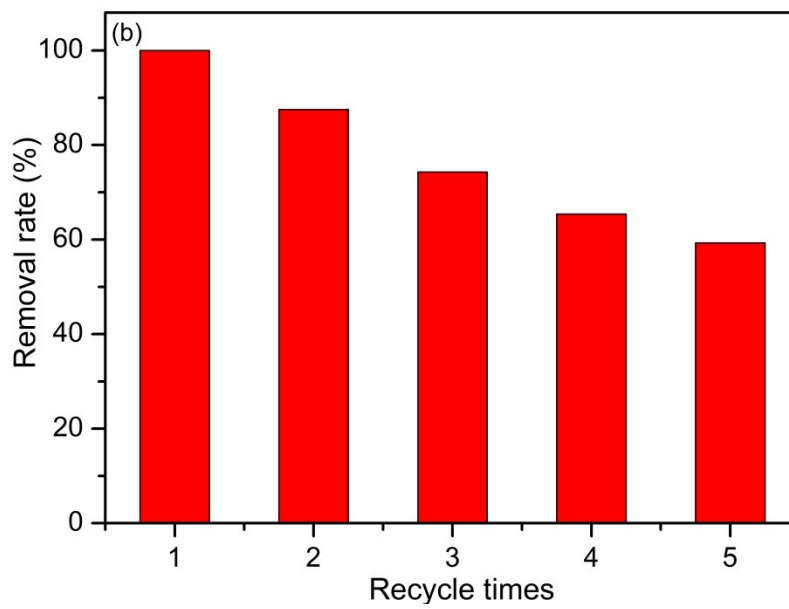

**Fig. S4** Recycle tests in the ODS of DBT over (a) MIL-125-CA-5 and (b) MIL-125.

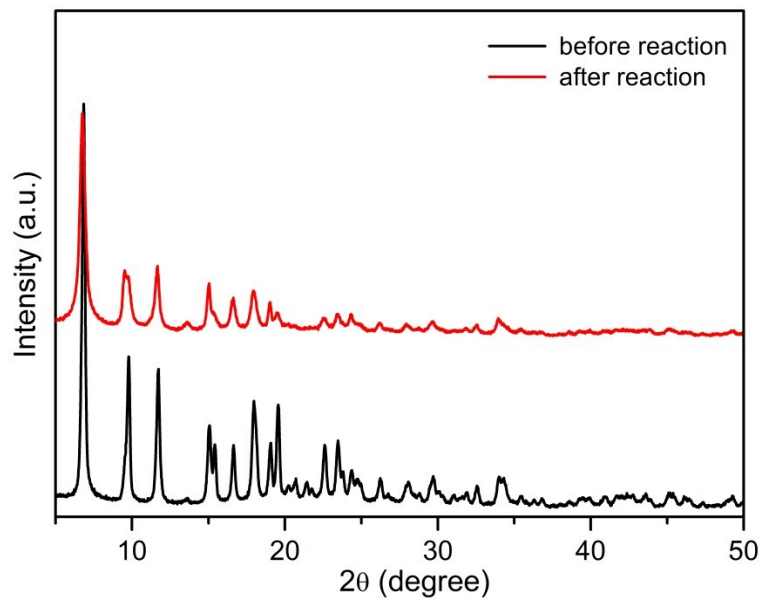

**Fig. S5** PXRD patterns of MIL-125-CA-5 before and after reaction in the recycle tests.

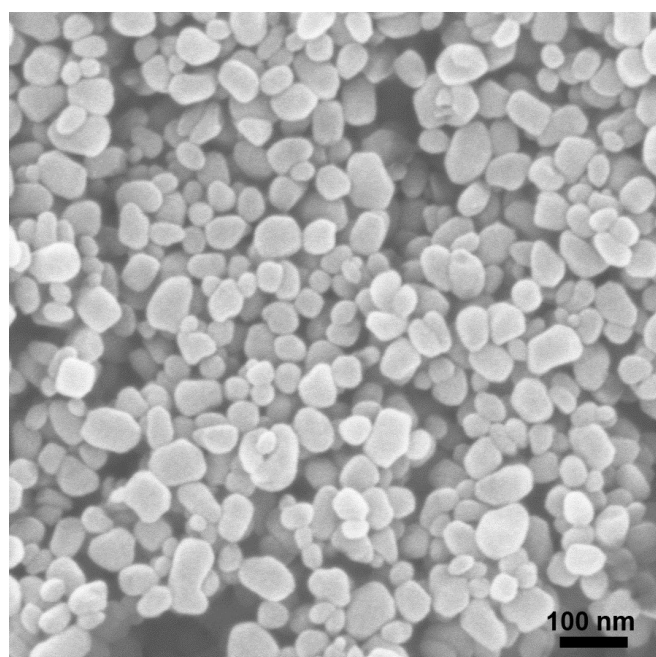

**Fig. S6** SEM image of MIL-125-CA-5 after reaction in the recycle tests.
